# Supplementary material for: Janus Ga2SeTe/In2SSe heterostructures: tunable electronic, optical, and photocatalytic properties
Source: Royal Society of Chemistry journal article supplement (doi:10.1039/d1cp04413c), 2022-01-01
Supplement: d1cp04413c1.pdf [file d1cp04413c1.pdf]

**Janus Ga<sub>2</sub>SeTe/In<sub>2</sub>SSe heterostructures: Tunable electronic, optical, and photocatalytic properties**

Heng-Fu Lin<sup>1,2†</sup>, Hui-Ying Liu<sup>1</sup>, Min Wang<sup>2</sup>, Shun-Shen Wang<sup>1,2</sup>, Ting-Ping Hou<sup>1,2</sup>,  
and Kai-Ming Wu<sup>1,2</sup>

<sup>1</sup> Hubei Province Key Laboratory of Systems Science in Metallurgical Process, and  
College of Science, Wuhan University of Science and Technology, Wuhan 430081,  
China

<sup>2</sup> The State Key Laboratory for Refractory Material and Metallurgy, International  
Research Institute for Steel Technology, and Collaborative Centre on Advanced  
Steels, Wuhan University of Science and Technology, Wuhan 430081, China

---

<sup>†</sup> Corresponding author. Email: hflin@wust.edu.cn (H. F. Lin).

**Table S1** Calculated lattice parameters ( $a$  and  $b$ ), and interlayer distance ( $d$ ) and binding energy for model 1 Ga<sub>2</sub>SeTe/In<sub>2</sub>SSe heterostructure (HS1) with five different stacking patterns using the vdW corrections of D2.

| Stacking patterns | $a(\text{Å})$ | $b(\text{Å})$ | $d(\text{Å})$ | $E_b(\text{eV})$ |
|-------------------|---------------|---------------|---------------|------------------|
| AA                | 3.89          | 3.89          | 3.99          | -0.14            |
| AB                | 3.89          | 3.89          | 3.15          | -0.25            |
| AC                | 3.89          | 3.89          | 3.67          | -0.14            |
| AD                | 3.90          | 3.90          | 3.10          | -0.22            |
| AE                | 3.90          | 3.90          | 3.08          | -0.22            |

**Table S2** Calculated lattice parameters ( $a$  and  $b$ ), and interlayer distance ( $d$ ) and binding energy for model 2 Ga<sub>2</sub>SeTe/In<sub>2</sub>SSe heterostructure (HS2) with five different stacking patterns using the vdW corrections of D2.

| Stacking patterns | $a(\text{Å})$ | $b(\text{Å})$ | $d(\text{Å})$ | $E_b(\text{eV})$ |
|-------------------|---------------|---------------|---------------|------------------|
| AA                | 3.89          | 3.89          | 3.90          | -0.16            |
| AB                | 3.89          | 3.89          | 3.27          | -0.28            |
| AC                | 3.89          | 3.89          | 3.95          | -0.16            |
| AD                | 3.90          | 3.90          | 3.22          | -0.25            |
| AE                | 3.90          | 3.90          | 3.21          | -0.26            |

**Table S3** Calculated lattice parameters ( $a$  and  $b$ ), and interlayer distance ( $d$ ) and binding energy for model 3 Ga<sub>2</sub>SeTe/In<sub>2</sub>SSe heterostructure (HS3) with five different stacking patterns using the vdW corrections of D2.

| Stacking patterns | $a(\text{Å})$ | $b(\text{Å})$ | $d(\text{Å})$ | $E_b(\text{eV})$ |
|-------------------|---------------|---------------|---------------|------------------|
| AA                | 3.89          | 3.89          | 3.78          | -0.12            |
| AB                | 3.90          | 3.90          | 3.05          | -0.23            |
| AC                | 3.89          | 3.89          | 3.76          | -0.13            |
| AD                | 3.89          | 3.89          | 3.03          | -0.20            |
| AE                | 3.89          | 3.89          | 3.02          | -0.20            |

**Table S4** Calculated lattice parameters ( $a$  and  $b$ ), and interlayer distance ( $d$ ) and binding energy for model 4 Ga<sub>2</sub>SeTe/In<sub>2</sub>SSe heterostructure (HS4) with five different stacking patterns using the vdW corrections of D2.

| Stacking patterns | $a(\text{Å})$ | $b(\text{Å})$ | $d(\text{Å})$ | $E_b(\text{eV})$ |
|-------------------|---------------|---------------|---------------|------------------|
| AA                | 3.89          | 3.89          | 3.97          | -0.14            |
| AB                | 3.89          | 3.89          | 3.19          | -0.26            |
| AC                | 3.90          | 3.90          | 3.95          | -0.15            |
| AD                | 3.89          | 3.89          | 3.15          | -0.23            |
| AE                | 3.89          | 3.89          | 3.16          | -0.24            |

**Table S5** Calculated lattice parameters ( $a$  and  $b$ ), and interlayer distance ( $d$ ) and binding energy for model 1 Ga<sub>2</sub>SeTe/In<sub>2</sub>SSe heterostructure (HS1) with five different stacking patterns using the vdW corrections of D3.

| Stacking patterns | $a(\text{Å})$ | $b(\text{Å})$ | $d(\text{Å})$ | $E_b(\text{eV})$ |
|-------------------|---------------|---------------|---------------|------------------|
| AA                | 3.97          | 3.97          | 3.83          | -0.16            |
| AB                | 3.98          | 3.98          | 3.18          | -0.24            |
| AC                | 3.97          | 3.97          | 3.83          | -0.16            |
| AD                | 3.98          | 3.98          | 3.10          | -0.23            |
| AE                | 3.98          | 3.98          | 3.20          | -0.23            |

**Table S6** Calculated lattice parameters ( $a$  and  $b$ ), and interlayer distance ( $d$ ) and binding energy for model 2 Ga<sub>2</sub>SeTe/In<sub>2</sub>SSe heterostructure (HS2) with five different stacking patterns using the vdW corrections of D3.

| Stacking patterns | $a(\text{Å})$ | $b(\text{Å})$ | $d(\text{Å})$ | $E_b(\text{eV})$ |
|-------------------|---------------|---------------|---------------|------------------|
| AA                | 3.97          | 3.97          | 3.87          | -0.17            |
| AB                | 3.97          | 3.97          | 3.16          | -0.25            |
| AC                | 3.97          | 3.97          | 3.82          | -0.16            |
| AD                | 3.98          | 3.98          | 3.13          | -0.24            |
| AE                | 3.98          | 3.98          | 3.23          | -0.24            |

**Table S7** Calculated lattice parameters ( $a$  and  $b$ ), and interlayer distance ( $d$ ) and binding energy for model 3 Ga<sub>2</sub>SeTe/In<sub>2</sub>SSe heterostructure (HS3) with five different stacking patterns using the vdW corrections of D3.

| Stacking patterns | $a(\text{Å})$ | $b(\text{Å})$ | $d(\text{Å})$ | $E_b(\text{eV})$ |
|-------------------|---------------|---------------|---------------|------------------|
| AA                | 3.98          | 3.98          | 3.86          | -0.15            |
| AB                | 3.98          | 3.98          | 3.18          | -0.23            |
| AC                | 3.97          | 3.97          | 3.83          | -0.14            |
| AD                | 3.98          | 3.98          | 3.10          | -0.23            |
| AE                | 3.98          | 3.98          | 3.22          | -0.22            |

**Table S8** Calculated lattice parameters ( $a$  and  $b$ ), and interlayer distance ( $d$ ) and binding energy for model 4 Ga<sub>2</sub>SeTe/In<sub>2</sub>SSe heterostructure (HS4) with five different stacking patterns using the vdW corrections of D3.

| Stacking patterns | $a(\text{Å})$ | $b(\text{Å})$ | $d(\text{Å})$ | $E_b(\text{eV})$ |
|-------------------|---------------|---------------|---------------|------------------|
| AA                | 3.97          | 3.97          | 3.88          | -0.16            |
| AB                | 3.98          | 3.98          | 3.18          | -0.24            |
| AC                | 3.97          | 3.97          | 3.80          | -0.15            |
| AD                | 3.98          | 3.98          | 3.10          | -0.23            |
| AE                | 3.98          | 3.98          | 3.11          | -0.24            |

**Table S9** Calculated lattice parameters ( $a$  and  $b$ ), and interlayer distance ( $d$ ) and binding energy for model 1 Ga<sub>2</sub>SeTe/In<sub>2</sub>SSe heterostructure (HS1) with five different stacking patterns using the vdW corrections of dDsC.

| Stacking patterns | $a(\text{\AA})$ | $b(\text{\AA})$ | $d(\text{\AA})$ | $E_b(\text{eV})$ |
|-------------------|-----------------|-----------------|-----------------|------------------|
| AA                | 3.95            | 3.95            | 3.81            | -0.16            |
| AB                | 3.95            | 3.95            | 3.22            | -0.22            |
| AC                | 3.94            | 3.94            | 4.00            | -0.17            |
| AD                | 3.95            | 3.95            | 3.08            | -0.22            |
| AE                | 3.94            | 3.94            | 3.30            | -0.21            |

**Table S10** Calculated lattice parameters ( $a$  and  $b$ ), and interlayer distance ( $d$ ) and binding energy for model 2 Ga<sub>2</sub>SeTe/In<sub>2</sub>SSe heterostructure (HS2) with five different stacking patterns using the vdW corrections of dDsC.

| Stacking patterns | $a(\text{\AA})$ | $b(\text{\AA})$ | $d(\text{\AA})$ | $E_b(\text{eV})$ |
|-------------------|-----------------|-----------------|-----------------|------------------|
| AA                | 3.95            | 3.89            | 3.88            | -0.16            |
| AB                | 3.95            | 3.89            | 3.27            | -0.22            |
| AC                | 3.94            | 3.89            | 3.96            | -0.16            |
| AD                | 3.94            | 3.90            | 3.10            | -0.21            |
| AE                | 3.95            | 3.90            | 3.23            | -0.21            |

**Table S11** Calculated lattice parameters ( $a$  and  $b$ ), and interlayer distance ( $d$ ) and binding energy for model 3 Ga<sub>2</sub>SeTe/In<sub>2</sub>SSe heterostructure (HS3) with five different stacking patterns using the vdW corrections of dDsC.

| Stacking patterns | $a(\text{\AA})$ | $b(\text{\AA})$ | $d(\text{\AA})$ | $E_b(\text{eV})$ |
|-------------------|-----------------|-----------------|-----------------|------------------|
| AA                | 3.95            | 3.95            | 3.88            | -0.14            |
| AB                | 3.95            | 3.95            | 3.12            | -0.22            |
| AC                | 3.94            | 3.94            | 3.97            | -0.15            |
| AD                | 3.95            | 3.95            | 3.11            | -0.23            |
| AE                | 3.95            | 3.95            | 3.25            | -0.22            |

**Table S12** Calculated lattice parameters ( $a$  and  $b$ ), and interlayer distance ( $d$ ) and binding energy for model 4 Ga<sub>2</sub>SeTe/In<sub>2</sub>SSe heterostructure (HS4) with five different stacking patterns using the vdW corrections of dDsC

| Stacking patterns | $a(\text{\AA})$ | $b(\text{\AA})$ | $d(\text{\AA})$ | $E_b(\text{eV})$ |
|-------------------|-----------------|-----------------|-----------------|------------------|
| AA                | 3.94            | 3.94            | 3.85            | -0.16            |
| AB                | 3.95            | 3.95            | 3.20            | -0.23            |
| AC                | 3.94            | 3.94            | 3.96            | -0.15            |
| AD                | 3.95            | 3.95            | 3.18            | -0.22            |
| AE                | 3.95            | 3.95            | 3.20            | -0.22            |

**Table S13** Calculated lattice parameters ( $a$  and  $b$ ), and interlayer distance ( $d$ ) and binding energy for model 1 Ga<sub>2</sub>SeTe/In<sub>2</sub>SSe heterostructure (HS1) with five different stacking patterns using the vdW corrections of TS.

| Stacking patterns | $a(\text{\AA})$ | $b(\text{\AA})$ | $d(\text{\AA})$ | $E_b(\text{eV})$ |
|-------------------|-----------------|-----------------|-----------------|------------------|
| AA                | 3.98            | 3.98            | 3.87            | -0.16            |
| AB                | 3.99            | 3.99            | 3.33            | -0.25            |
| AC                | 3.99            | 3.99            | 3.88            | -0.16            |
| AD                | 3.99            | 3.99            | 3.10            | -0.23            |
| AE                | 3.99            | 3.99            | 3.20            | -0.24            |

**Table S14** Calculated lattice parameters ( $a$  and  $b$ ), and interlayer distance ( $d$ ) and binding energy for model 2 Ga<sub>2</sub>SeTe/In<sub>2</sub>SSe heterostructure (HS2) with five different stacking patterns using the vdW corrections of TS.

| Stacking patterns | $a(\text{\AA})$ | $b(\text{\AA})$ | $d(\text{\AA})$ | $E_b(\text{eV})$ |
|-------------------|-----------------|-----------------|-----------------|------------------|
| AA                | 3.98            | 3.98            | 3.90            | -0.16            |
| AB                | 3.99            | 3.99            | 3.24            | -0.25            |
| AC                | 3.99            | 3.99            | 3.87            | -0.16            |
| AD                | 3.98            | 3.98            | 3.13            | -0.24            |
| AE                | 3.99            | 3.99            | 3.28            | -0.25            |

**Table S15** Calculated lattice parameters ( $a$  and  $b$ ), and interlayer distance ( $d$ ) and binding energy for model 3 Ga<sub>2</sub>SeTe/In<sub>2</sub>SSe heterostructure (HS3) with five different stacking patterns using the vdW corrections of TS

| Stacking patterns | $a(\text{\AA})$ | $b(\text{\AA})$ | $d(\text{\AA})$ | $E_b(\text{eV})$ |
|-------------------|-----------------|-----------------|-----------------|------------------|
| AA                | 3.98            | 3.98            | 3.92            | -0.16            |
| AB                | 3.99            | 3.99            | 3.31            | -0.25            |
| AC                | 3.99            | 3.99            | 3.78            | -0.15            |
| AD                | 4.00            | 4.00            | 3.13            | -0.23            |
| AE                | 3.99            | 3.99            | 3.12            | -0.24            |

**Table S16** Calculated lattice parameters ( $a$  and  $b$ ), and interlayer distance ( $d$ ) and binding energy for model 4 Ga<sub>2</sub>SeTe/In<sub>2</sub>SSe heterostructure (HS4) with five different stacking patterns using the vdW corrections of TS.

| Stacking patterns | $a(\text{\AA})$ | $b(\text{\AA})$ | $d(\text{\AA})$ | $E_b(\text{eV})$ |
|-------------------|-----------------|-----------------|-----------------|------------------|
| AA                | 3.98            | 3.98            | 3.85            | -0.16            |
| AB                | 3.99            | 3.99            | 3.35            | -0.26            |
| AC                | 3.98            | 3.98            | 3.89            | -0.15            |
| AD                | 3.99            | 3.99            | 3.16            | -0.25            |
| AE                | 3.99            | 3.99            | 3.27            | -0.25            |



**Figure S1.** Cut off energy ( $E_{\text{cut}}$ ) test for the  $\text{Ga}_2\text{SeTe}/\text{In}_2\text{SSe}$  (HS1-AB) vdW heterostructures system, where the energy at  $E_{\text{cut}}=200$  eV has been set to 0.



**Figure S2.** Total energy of  $\text{Ga}_2\text{SeTe}/\text{In}_2\text{SSe}$  (HS1-AB) vdW heterostructures as a function of k-mesh. Here, the energy of k-mesh=4\*4\*1 is set to 0.



**Figure S3.** Total energy of  $\text{Ga}_2\text{SeTe}/\text{In}_2\text{SSe}$  (HS1-AB) vdW heterostructures as a function of vacuum region. Here, the energy with a vacuum region of 6 Å is set to 0.



**Figure S4.** The PBE band structure of single layer janus  $\text{Ga}_2\text{SeTe}$  and  $\text{In}_2\text{SSe}$ .



**Figure S5.** The HSE06+SOC band structure of single layer janus Ga<sub>2</sub>SeTe and In<sub>2</sub>SSe.



**Figure S6.** Phonon spectrum of Ga<sub>2</sub>SeTe/In<sub>2</sub>SSe (HS1-AB) vdw heterostructures.



**Figure S7.** The variation of total energy of Ga<sub>2</sub>SeTe/In<sub>2</sub>SSe (HS1-AB) vdW heterostructures as a function of time at temperature 300 K.



**Figure S8.** The variation of the binding energy of Ga<sub>2</sub>SeTe/In<sub>2</sub>SSe (HS1-AB) vdW heterostructure as a function of interlayer distance.



**Figure S8.** The average potential energy of janus Ga<sub>2</sub>SeTe/In<sub>2</sub>SSe heterostructures: (a) HS2-AB, (b) HS3-AB, and (c) HS4-AB. Planar averaged charge density difference of janus Ga<sub>2</sub>SeTe/In<sub>2</sub>SSe heterostructures: (d) HS2-AB, (e) HS3-AB, and (f) HS4-AB.



**Figure S9.** 3D isosurface of the differential electron density of janus Ga<sub>2</sub>SeTe/In<sub>2</sub>SSe heterostructures (with the isovalue  $0.0001 e/\text{Å}^3$ ): (a) HS2-AB, (b) HS3-AB, and (c) HS4-AB, where the yellow and cyan regions represent electron accumulation and depletion.



**Figure S10.** (a) Calculated absorption coefficients of the Janus  $\text{Ga}_2\text{SeTe}$  monolayer, Janus  $\text{In}_2\text{SSe}$  monolayer, and Janus  $\text{Ga}_2\text{SeTe}/\text{In}_2\text{SSe}$  heterostructures using GW-BSE approach. The first absorption peaks are marked by the arrows.
